# Supplementary material for: Detection of a Frameshift Deletion in the SPTBN4 Gene Leads to Prevention of Severe Myopathy and Postnatal Mortality in Pigs
Source: Front Genet. 2019 Nov 26;10:1226. doi: 10.3389/fgene.2019.01226 (PMC6902008; doi:10.3389/fgene.2019.01226)
Supplement: Table S2 — Genotyping of the CxC litter including two affected individuals (farrowing date: April 28th 2019). Table shows homozygous del/del status for the two affected piglets 9912,9916. [file Table_2.xlsx]

## Sheet: TableS2
Table S2: Genotyping of the CxC litter including two affected individuals (farrowing date: April 28th 2019). Table shows homozygous del/del status for the two affected piglets 9912,9916.
Sample ID	Phenotype	Allele 1	Allele 2	Status
9912	Affected	354	354	Del/Del
9913	Healthy	354	370	Heterozygous
9914	Healthy	354	370	Heterozygous
9915	Healthy	370	370	Wildtype/Wildtype
9916	Affected	354	354	Del/Del
9917	Healthy	354	370	Heterozygous
9918	Healthy	370	370	Wildtype/Wildtype
9919	Healthy	354	370	Heterozygous
9920	Stillborn	354	370	Heterozygous
9921	Stillborn	354	354	Del/Del
9922	Stillborn	354	370	Heterozygous
