# Supplementary material for: Detection of a Frameshift Deletion in the SPTBN4 Gene Leads to Prevention of Severe Myopathy and Postnatal Mortality in Pigs
Source: Front Genet. 2019 Nov 26;10:1226. doi: 10.3389/fgene.2019.01226 (PMC6902008; doi:10.3389/fgene.2019.01226)
Supplement: Table S3 — Mapping and coverage statistics from WGS samples. [file Table_3.xlsx]

## Sheet: Blad1
Table S3: Mapping and coverage statistics from WGS samples
Sample	# Reads	# Base pairs	Mean coverage	% Mapped
Pig_272	159519053	22533621788	9.0143	0.9891
Pig_273	178408811	25374193296	10.1507	0.9863
Pig_274	166225085	23083297257	9.2344	0.9795
Pig_275	168016532	23277599931	9.312	0.9747
Pig_276	162030484	22791691607	9.1181	0.9815
Pig_277	166316396	23529503060	9.4132	0.9768
Pig_278	160954419	22569261546	9.0291	0.9729
Pig_279	164751473	22611642705	9.0453	0.976
Pig_282	163544187	22694097676	9.0783	0.9841
Pig_283	189086696	26671304362	10.6691	0.99
Pig_284	164823778	22885171269	9.1556	0.968
Pig_310	189082693	26646005528	10.6588	0.9894
Pig_311	165470604	22464163569	8.9874	0.9806
Pig_313	162536066	22065538339	8.8279	0.98
Pig_314	189008955	25983784746	10.3938	0.9656
Pig_315	165036028	22753621574	9.1025	0.9807
Pig_316	163891847	22739985553	9.0966	0.9823
Pig_317	168830152	23306128042	9.3233	0.9757
Pig_318	167330062	23081391622	9.2334	0.9786
Pig_319	167039470	23627969867	9.4516	0.9935
Pig_WUR_380	206489873	28417428149	11.3699	0.9932
Pig_WUR_381	194211207	26355290798	10.5445	0.993
Pig_WUR_382	199987444	28690380862	11.477	0.9931
Pig_WUR_383	227117611	29773698871	11.9137	0.9947
Pig_WUR_384	194673685	27795077131	11.1215	0.9945
Pig_WUR_385	195211148	27116835573	10.8488	0.9946
Pig_WUR_386	219355512	29247656152	11.7044	0.9955
Pig_WUR_387	224225824	32384801003	12.9548	0.9937
Pig_WUR_388	199951375	26595344246	10.641	0.9923
Pig_WUR_389	209573957	26814034436	10.7287	0.9947
Pig_WUR_390	194612586	27250407688	10.9009	0.9626
Pig_WUR_391	200689035	26846037652	10.7415	0.9935
Pig_WUR_392	219036672	28466087083	11.3906	0.9937
Pig_WUR_393	208834894	26995326571	10.8016	0.9944
Pig_WUR_394	216746487	30530927900	12.215	0.9931
Pig_WUR_395	214490345	28576423675	11.434	0.9926
Pig_WUR_396	191909780	27544578852	11.019	0.9938
Pig_WUR_397	209354212	29845905122	11.9421	0.9941
Pig_WUR_398	211287207	28575682838	11.4331	0.9935
Pig_WUR_399	209482675	30530568825	12.213	0.9956
Pig_WUR_400	226238036	32227898606	12.895	0.9942
Pig_WUR_401	190874388	27255562386	10.9036	0.9938
Pig_WUR_402	220990129	27718065964	11.0913	0.995
Pig_WUR_403	219759195	28475215612	11.394	0.9941
Pig_WUR_404	189726950	26665837136	10.6678	0.9935
Pig_WUR_405	240444650	30016679813	12.0113	0.9945
Pig_WUR_406	206708330	29985825108	11.9951	0.9943
Pig_WUR_407	219271414	26806408086	10.7271	0.9952
Pig_WUR_408	220673451	31030152416	12.4161	0.9938
Pig_WUR_409	196690375	26407778614	10.5656	0.991
Pig_WUR_410	225301227	27495875579	11.0022	0.9933
Pig_WUR_411	230583250	32980116103	13.196	0.9944
Pig_WUR_412	188519607	26265280386	10.508	0.9931
Pig_WUR_413	222060985	31570445297	12.6298	0.9938
Pig_WUR_414	228465779	26818502558	10.7319	0.9961
Pig_WUR_415	254707745	32359764810	12.9492	0.9945
Pig_WUR_416	186371144	26905302086	10.7627	0.9935
Pig_WUR_417	223992708	27058324773	10.8278	0.9946
Pig_WUR_418	198930746	28909410545	11.5646	0.9942
Pig_WUR_419	217003198	26509923637	10.6085	0.9951
Pig_WUR_420	188295962	27161300937	10.8652	0.9889
Pig_WUR_421	214147136	30129513809	12.0539	0.9928
Pig_WUR_422	215661525	31050160710	12.4205	0.9916
Pig_WUR_423	193731795	26522702269	10.6117	0.9927
Pig_WUR_424	221736062	27271759921	10.9133	0.9942
Pig_WUR_425	219346670	31668034526	12.6681	0.9879
Pig_WUR_426	189468648	26781946534	10.7145	0.9936
Pig_WUR_427	258401404	36974109202	14.7923	0.9933
Pig_WUR_428	212980497	27574452515	11.0335	0.9935
Pig_WUR_429	196149386	25935140731	10.3769	0.9932
Pig_WUR_430	211068094	27037842464	10.819	0.9905
SUM	14157444806	1930611799897	10.879	0.989376
